# Supplementary material for: Immunomodulatory and antimicrobial non-mulberry Antheraea mylitta silk fibroin accelerates in vitro fibroblast repair and regeneration by protecting oxidative stress
Source: Royal Society of Chemistry journal article supplement (doi:10.1039/d0ra08538c), 2021-01-01
Supplement: d0ra08538c1.pdf [file d0ra08538c1.pdf]

## **Supporting Information**

### **Immunomodulatory and antimicrobial non-mulberry *Antheraea mylitta* silk fibroin accelerates in vitro fibroblast regeneration by protecting oxidative stress**

Sohini Sen<sup>a</sup>, Shaunak Ghosh<sup>b§</sup>, Sayantan De<sup>b§</sup>, Piyali Basak<sup>a</sup>, Praveen Maurye<sup>c</sup>,

Nandan Kumar Jana<sup>b</sup>, Tapan Kumar Mandal<sup>d</sup>

<sup>a</sup>School of Bioscience and Engineering, Jadavpur University,

188, Raja S.C. Mullick Road, Kolkata-700032, West Bengal, India

<sup>b</sup>Department of Biotechnology, Heritage Institute of Technology,

Chowbagha Road, Anandapur,

PO: East Kolkata Township, Kolkata 700107, West Bengal, India

<sup>c</sup>Central Inland Fisheries Research Institute

Barrackpore, Monirampore, Kolkata 700120

<sup>d</sup>Veterinary Pharmacology & Toxicology, West Bengal University of Animal &  
Fishery Sciences,

37&68 Kshudiram Bose Sarani, Kolkata 700037

\* Corresponding author's email: [piyalibasak@gmail.com](mailto:piyalibasak@gmail.com)

Telephone: (+91-33)-2414-6666 (Ext. 2958)

§ indicates both the authors contributed equally

---

Non-mulberry SF ladder

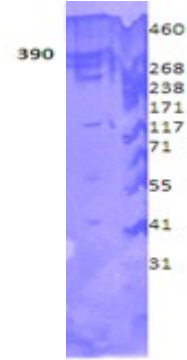

Fig 1. SDS-PAGE non-mulberry (*Antheraea mylitta*) SF identification

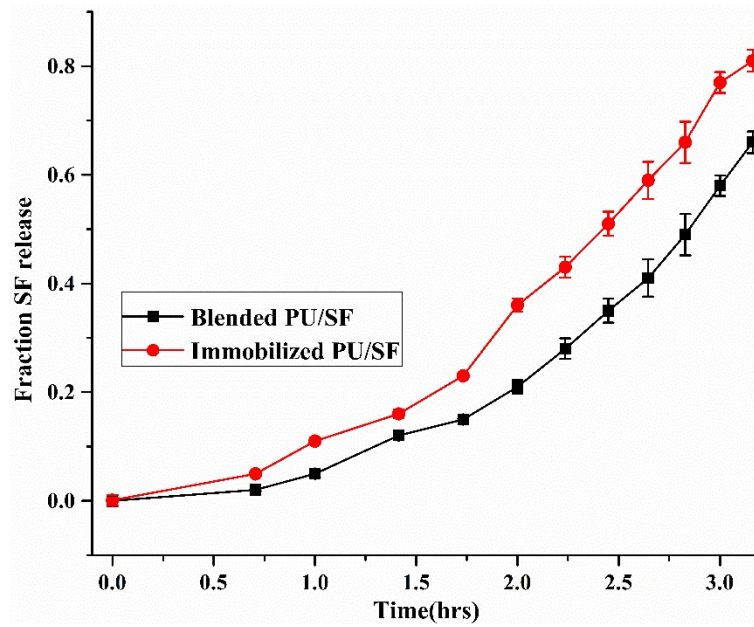

Fig 2. Fraction release of SF from PU/SF matrix

a1

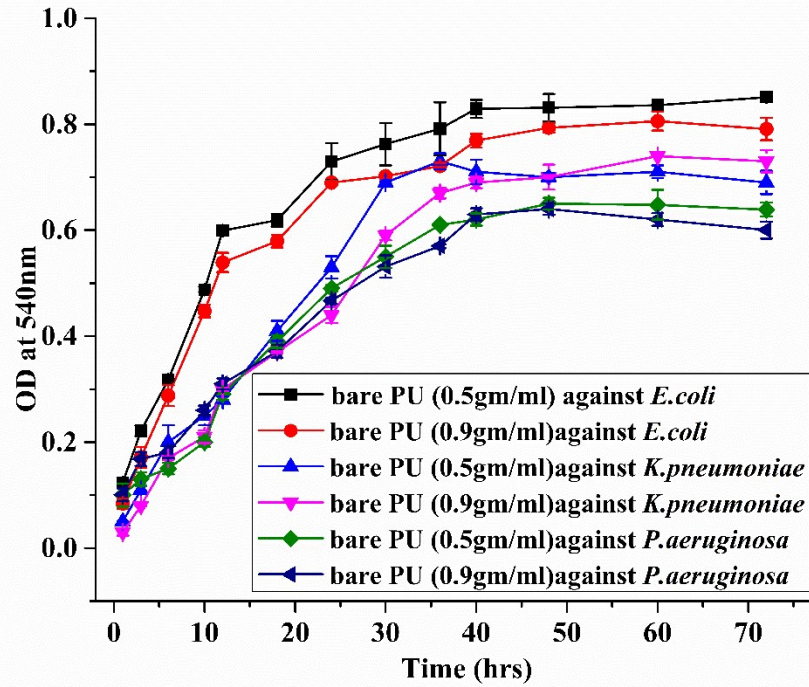

a2

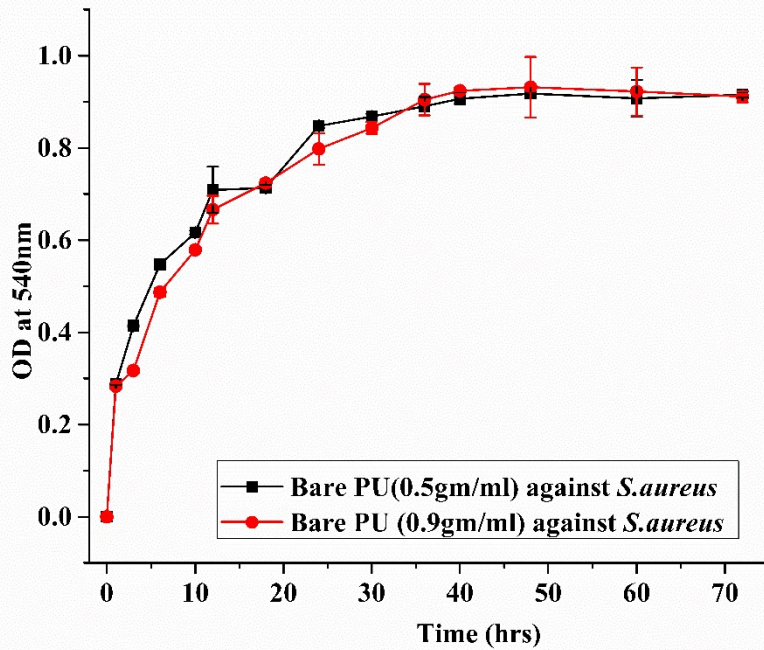

Fig 3. Growth curve of a1. Gram positive and a2. Gram negative bacteria against bare PU
